# Supplementary material for: Mental Quality of Life Is Related to a Cytokine Genetic Pathway
Source: PLoS One. 2012 Sep 25;7(9):e45126. doi: 10.1371/journal.pone.0045126 (PMC3458023; doi:10.1371/journal.pone.0045126)
Supplement: Table S3 — Included SNPs. (XLS) [file pone.0045126.s004.xls]

## Sheet: tablepaper
SNP	Gene	Chr	Position Start	Position End
rs3021094	IL10	1	206944951	206944952
rs3024492	IL10	1	206944111	206944112
rs3024496	IL10	1	206941863	206941864
rs3024498	IL10	1	206941528	206941529
rs3024499	IL10	1	206941028	206941029
rs3024510	IL10	1	206941635	206941636
rs1109461	IL20	1	207041802	207041803
rs2232363	IL20	1	207042032	207042033
rs3024519	IL20	1	207040937	207040938
rs3024522	IL20	1	207042562	207042563
rs1004819	IL23R	1	67670212	67670213
rs10127763	IL23R	1	67651732	67651733
rs10489629	IL23R	1	67688348	67688349
rs10489630	IL23R	1	67662621	67662622
rs10889665	IL23R	1	67636651	67636652
rs10889675	IL23R	1	67722215	67722216
rs10889676	IL23R	1	67722566	67722567
rs10889677	IL23R	1	67725119	67725120
rs11209018	IL23R	1	67667290	67667291
rs11209026	IL23R	1	67705957	67705958
rs11465759	IL23R	1	67632403	67632404
rs11465785	IL23R	1	67636027	67636028
rs11465802	IL23R	1	67685597	67685598
rs11465804	IL23R	1	67702525	67702526
rs11465817	IL23R	1	67721096	67721097
rs11465827	IL23R	1	67724827	67724828
rs11805303	IL23R	1	67675515	67675516
rs12030948	IL23R	1	67701764	67701765
rs12070470	IL23R	1	67697270	67697271
rs12751814	IL23R	1	67704862	67704863
rs1321157	IL23R	1	67654109	67654110
rs1343151	IL23R	1	67719128	67719129
rs17129685	IL23R	1	67636588	67636589
rs1884444	IL23R	1	67633811	67633812
rs2064689	IL23R	1	67653009	67653010
rs2201841	IL23R	1	67694201	67694202
rs2863212	IL23R	1	67685115	67685116
rs2902440	IL23R	1	67670915	67670916
rs4655690	IL23R	1	67659895	67659896
rs6588248	IL23R	1	67652983	67652984
rs6682033	IL23R	1	67708669	67708670
rs6688383	IL23R	1	67655953	67655954
rs6693831	IL23R	1	67720866	67720867
rs7517847	IL23R	1	67681668	67681669
rs7528924	IL23R	1	67689035	67689036
rs7530511	IL23R	1	67685386	67685387
rs7539625	IL23R	1	67672764	67672765
rs790631	IL23R	1	67676921	67676922
rs11265618	IL6R	1	154430091	154430092
rs1386821	IL6R	1	154382048	154382049
rs2229238	IL6R	1	154437895	154437896
rs4072391	IL6R	1	154438879	154438880
rs4129267	IL6R	1	154426263	154426264
rs4240872	IL6R	1	154436194	154436195
rs4329505	IL6R	1	154432419	154432420
rs4537545	IL6R	1	154418878	154418879
rs4845617	IL6R	1	154377897	154377898
rs4845618	IL6R	1	154400014	154400015
rs4845625	IL6R	1	154422066	154422067
rs6427641	IL6R	1	154380485	154380486
rs7514452	IL6R	1	154438083	154438084
rs7518199	IL6R	1	154407418	154407419
rs7553796	IL6R	1	154404405	154404406
rs8192282	IL6R	1	154401678	154401679
rs1061622	TNFRSF1B	1	12252954	12252955
rs1061624	TNFRSF1B	1	12267264	12267265
rs1061628	TNFRSF1B	1	12267998	12267999
rs1061631	TNFRSF1B	1	12268498	12268499
rs1201157	TNFRSF1B	1	12249030	12249031
rs1800621	TNFRSF1B	1	12268570	12268571
rs2229700	TNFRSF1B	1	12254014	12254015
rs3397	TNFRSF1B	1	12267291	12267292
rs3766730	TNFRSF1B	1	12240675	12240676
rs496888	TNFRSF1B	1	12232805	12232806
rs5745977	TNFRSF1B	1	12239529	12239530
rs5746026	TNFRSF1B	1	12253061	12253062
rs5746053	TNFRSF1B	1	12262297	12262298
rs5746059	TNFRSF1B	1	12262791	12262792
rs5746065	TNFRSF1B	1	12267463	12267464
rs5746073	TNFRSF1B	1	12268636	12268637
rs5746074	TNFRSF1B	1	12268720	12268721
rs597519	TNFRSF1B	1	12234884	12234885
rs636964	TNFRSF1B	1	12253350	12253351
rs653667	TNFRSF1B	1	12251807	12251808
rs666078	TNFRSF1B	1	12251317	12251318
rs683240	TNFRSF1B	1	12249828	12249829
rs816050	TNFRSF1B	1	12241990	12241991
rs945439	TNFRSF1B	1	12248941	12248942
rs976881	TNFRSF1B	1	12233753	12233754
rs10158707	TNFSF4	1	173157200	173157201
rs10912561	TNFSF4	1	173164564	173164565
rs1234313	TNFSF4	1	173166246	173166247
rs16845543	TNFSF4	1	173153467	173153468
rs16845585	TNFSF4	1	173164810	173164811
rs3850641	TNFSF4	1	173175831	173175832
rs3861949	TNFSF4	1	173153185	173153186
rs3861950	TNFSF4	1	173156291	173156292
rs3900307	TNFSF4	1	173153441	173153442
rs4081545	TNFSF4	1	173159515	173159516
rs7518045	TNFSF4	1	173163511	173163512
rs7525284	TNFSF4	1	173168396	173168397
rs2396506	CCL20	2	228680579	228680580
rs16858794	CXCR1	2	219028032	219028033
rs16858798	CXCR1	2	219028474	219028475
rs16858801	CXCR1	2	219028588	219028589
rs16858803	CXCR1	2	219028646	219028647
rs16858808	CXCR1	2	219028931	219028932
rs16858811	CXCR1	2	219029842	219029843
rs3092971	CXCR1	2	219028133	219028134
rs1126580	CXCR2	2	219000965	219000966
rs13306441	CXCR2	2	219000944	219000945
rs17844673	CXCR2	2	218990896	218990897
rs17844765	CXCR2	2	219000961	219000962
rs4674259	CXCR2	2	218991004	218991005
rs6723449	CXCR2	2	218997579	218997580
rs2228014	CXCR4	2	136873083	136873084
rs2680880	CXCR4	2	136873548	136873549
rs11465702	IL18RAP	2	103057891	103057892
rs11465716	IL18RAP	2	103061775	103061776
rs11465730	IL18RAP	2	103066857	103066858
rs11465732	IL18RAP	2	103067822	103067823
rs11465739	IL18RAP	2	103068836	103068837
rs13383035	IL18RAP	2	103055333	103055334
rs17027173	IL18RAP	2	103057042	103057043
rs2058659	IL18RAP	2	103054555	103054556
rs2110734	IL18RAP	2	103052205	103052206
rs2110735	IL18RAP	2	103050924	103050925
rs2293223	IL18RAP	2	103035467	103035468
rs3771150	IL18RAP	2	103060850	103060851
rs6734736	IL18RAP	2	103062879	103062880
rs7559479	IL18RAP	2	103068786	103068787
rs17561	IL1A	2	113537222	113537223
rs1800587	IL1A	2	113542959	113542960
rs2856837	IL1A	2	113541924	113541925
rs3783572	IL1A	2	113541381	113541382
rs3783575	IL1A	2	113539872	113539873
rs1071676	IL1B	2	113587432	113587433
rs1143633	IL1B	2	113590466	113590467
rs1143634	IL1B	2	113590389	113590390
rs3136558	IL1B	2	113591274	113591275
rs895497	IL1F6	2	113763574	113763575
rs10185897	IL1RL1	2	102966789	102966790
rs10192036	IL1RL1	2	102968210	102968211
rs10192157	IL1RL1	2	102968355	102968356
rs1041973	IL1RL1	2	102955467	102955468
rs12712135	IL1RL1	2	102930947	102930948
rs12712142	IL1RL1	2	102960583	102960584
rs12999517	IL1RL1	2	102959259	102959260
rs13001325	IL1RL1	2	102939035	102939036
rs1420089	IL1RL1	2	102938388	102938389
rs1420101	IL1RL1	2	102957715	102957716
rs17639215	IL1RL1	2	102953443	102953444
rs17695648	IL1RL1	2	102948180	102948181
rs17696376	IL1RL1	2	102965152	102965153
rs1921622	IL1RL1	2	102966066	102966067
rs2160203	IL1RL1	2	102960823	102960824
rs4988956	IL1RL1	2	102968006	102968007
rs4988957	IL1RL1	2	102968074	102968075
rs4988958	IL1RL1	2	102968284	102968285
rs7571371	IL1RL1	2	102953726	102953727
rs2232355	IL1RN	2	113890378	113890379
rs2234677	IL1RN	2	113875508	113875509
rs2234678	IL1RN	2	113875564	113875565
rs2234679	IL1RN	2	113875583	113875584
rs2254511	IL1RN	2	113876821	113876822
rs3087266	IL1RN	2	113889099	113889100
rs315919	IL1RN	2	113876212	113876213
rs315951	IL1RN	2	113890585	113890586
rs315952	IL1RN	2	113890303	113890304
rs3181052	IL1RN	2	113886048	113886049
rs3181053	IL1RN	2	113886141	113886142
rs3213448	IL1RN	2	113879296	113879297
rs419598	IL1RN	2	113887206	113887207
rs423904	IL1RN	2	113887261	113887262
rs4251985	IL1RN	2	113877412	113877413
rs4252003	IL1RN	2	113885129	113885130
rs4252004	IL1RN	2	113885321	113885322
rs4252023	IL1RN	2	113890372	113890373
rs4252028	IL1RN	2	113890758	113890759
rs4252041	IL1RN	2	113890609	113890610
rs431726	IL1RN	2	113889005	113889006
rs9005	IL1RN	2	113891411	113891412
rs10432475	TNFAIP6	2	152224939	152224940
rs1046668	TNFAIP6	2	152226569	152226570
rs1046675	TNFAIP6	2	152236397	152236398
rs3771892	TNFAIP6	2	152218230	152218231
rs3771895	TNFAIP6	2	152224338	152224339
rs3845844	TNFAIP6	2	152231293	152231294
rs3136664	CCR1	3	46245423	46245424
rs3136665	CCR1	3	46244569	46244570
rs3136667	CCR1	3	46244283	46244284
rs3136670	CCR1	3	46243360	46243361
rs3092962	CCR2	3	46397038	46397039
rs13073976	CCR3	3	46286662	46286663
rs1491962	CCR3	3	46304605	46304606
rs4987053	CCR3	3	46306699	46306700
rs6441948	CCR3	3	46295776	46295777
rs7652290	CCR3	3	46299764	46299765
rs6550178	CCR4	3	32993491	32993492
rs2856762	CCR5	3	46413333	46413334
rs10212103	IL1RAP	3	190239147	190239148
rs1024946	IL1RAP	3	190347522	190347523
rs1024949	IL1RAP	3	190347731	190347732
rs10937439	IL1RAP	3	190293554	190293555
rs10937441	IL1RAP	3	190294187	190294188
rs11719243	IL1RAP	3	190237100	190237101
rs11915384	IL1RAP	3	190370763	190370764
rs12106852	IL1RAP	3	190371370	190371371
rs1559018	IL1RAP	3	190297082	190297083
rs16865597	IL1RAP	3	190275544	190275545
rs16865627	IL1RAP	3	190283006	190283007
rs16865686	IL1RAP	3	190327569	190327570
rs2080794	IL1RAP	3	190271176	190271177
rs2193873	IL1RAP	3	190313506	190313507
rs2193876	IL1RAP	3	190342165	190342166
rs2193880	IL1RAP	3	190262798	190262799
rs2241343	IL1RAP	3	190282713	190282714
rs2361832	IL1RAP	3	190260036	190260037
rs3773953	IL1RAP	3	190314719	190314720
rs3773963	IL1RAP	3	190307447	190307448
rs3773967	IL1RAP	3	190305017	190305018
rs3773970	IL1RAP	3	190292101	190292102
rs3773971	IL1RAP	3	190292027	190292028
rs3773976	IL1RAP	3	190287284	190287285
rs3773978	IL1RAP	3	190286885	190286886
rs3773980	IL1RAP	3	190284585	190284586
rs3773982	IL1RAP	3	190280051	190280052
rs3773986	IL1RAP	3	190278914	190278915
rs3773989	IL1RAP	3	190265428	190265429
rs3773990	IL1RAP	3	190262051	190262052
rs3773992	IL1RAP	3	190253664	190253665
rs3773997	IL1RAP	3	190235787	190235788
rs4571225	IL1RAP	3	190324453	190324454
rs4686554	IL1RAP	3	190273817	190273818
rs4687148	IL1RAP	3	190264269	190264270
rs4687150	IL1RAP	3	190280883	190280884
rs4687160	IL1RAP	3	190341240	190341241
rs6444435	IL1RAP	3	190303804	190303805
rs6764286	IL1RAP	3	190282185	190282186
rs6764850	IL1RAP	3	190243452	190243453
rs6800609	IL1RAP	3	190234303	190234304
rs716984	IL1RAP	3	190323874	190323875
rs759783	IL1RAP	3	190330776	190330777
rs7615824	IL1RAP	3	190336198	190336199
rs7626795	IL1RAP	3	190350460	190350461
rs7628250	IL1RAP	3	190308526	190308527
rs7650510	IL1RAP	3	190363115	190363116
rs7652346	IL1RAP	3	190312432	190312433
rs9290935	IL1RAP	3	190237350	190237351
rs9290939	IL1RAP	3	190333875	190333876
rs9813227	IL1RAP	3	190340176	190340177
rs9831803	IL1RAP	3	190361496	190361497
rs9849030	IL1RAP	3	190257178	190257179
rs9862847	IL1RAP	3	190301871	190301872
rs9876152	IL1RAP	3	190255191	190255192
rs9877268	IL1RAP	3	190285821	190285822
rs9883249	IL1RAP	3	190281375	190281376
rs997534	IL1RAP	3	190260162	190260163
rs4074	CXCL1	4	74736143	74736144
rs35795399	CXCL10	4	76942676	76942677
rs8878	CXCL10	4	76942299	76942300
rs10017431	CXCL11	4	76955405	76955406
rs4859415	CXCL11	4	76956527	76956528
rs6532111	CXCL11	4	76955913	76955914
rs7436646	CXCL11	4	76955228	76955229
rs10009964	CXCL13	4	78500672	78500673
rs1052563	CXCL13	4	78532231	78532232
rs1077234	CXCL13	4	78459360	78459361
rs1596231	CXCL13	4	78464697	78464698
rs17002716	CXCL13	4	78448017	78448018
rs17002731	CXCL13	4	78513986	78513987
rs171388	CXCL13	4	78521524	78521525
rs17406477	CXCL13	4	78456501	78456502
rs1867106	CXCL13	4	78511755	78511756
rs189587	CXCL13	4	78500084	78500085
rs2584819	CXCL13	4	78509803	78509804
rs2903289	CXCL13	4	78530067	78530068
rs355661	CXCL13	4	78523091	78523092
rs355667	CXCL13	4	78495882	78495883
rs355679	CXCL13	4	78478505	78478506
rs355686	CXCL13	4	78505371	78505372
rs355687	CXCL13	4	78505577	78505578
rs355689	CXCL13	4	78507796	78507797
rs920666	CXCL13	4	78511202	78511203
rs1837558	CXCL2	4	74963583	74963584
rs9131	CXCL2	4	74963048	74963049
rs181272	CXCL3	4	74903363	74903364
rs370655	CXCL3	4	74903133	74903134
rs16850073	CXCL6	4	74703998	74703999
rs10031051	CXCL9	4	76924570	76924571
rs10031452	CXCL9	4	76924932	76924933
rs10336	CXCL9	4	76922987	76922988
rs3733236	CXCL9	4	76923997	76923998
rs10519610	IL15	4	142637100	142637101
rs10519612	IL15	4	142653700	142653701
rs10833	IL15	4	142654546	142654547
rs12504148	IL15	4	142590102	142590103
rs12510514	IL15	4	142601495	142601496
rs13122930	IL15	4	142650412	142650413
rs1519551	IL15	4	142570471	142570472
rs1607595	IL15	4	142635647	142635648
rs17007565	IL15	4	142634710	142634711
rs2322262	IL15	4	142575265	142575266
rs2322301	IL15	4	142636312	142636313
rs3775597	IL15	4	142649654	142649655
rs6850492	IL15	4	142637304	142637305
rs957077	IL15	4	142579815	142579816
rs2069763	IL2	4	123377481	123377482
rs17879298	IL21	4	123533833	123533834
rs17886348	IL21	4	123533819	123533820
rs4833837	IL21	4	123536962	123536963
rs1126647	IL8	4	74609044	74609045
rs2227538	IL8	4	74606374	74606375
rs2227543	IL8	4	74607909	74607910
rs1003199	IL12B	5	158755565	158755566
rs11574790	IL12B	5	158743845	158743846
rs2288831	IL12B	5	158750012	158750013
rs2546893	IL12B	5	158755959	158755960
rs2569254	IL12B	5	158751248	158751249
rs2853694	IL12B	5	158749087	158749088
rs3212217	IL12B	5	158755129	158755130
rs3212220	IL12B	5	158754194	158754195
rs3212227	IL12B	5	158742949	158742950
rs3213094	IL12B	5	158750768	158750769
rs3213096	IL12B	5	158750328	158750329
rs3213119	IL12B	5	158743787	158743788
rs3213120	IL12B	5	158743107	158743108
rs730691	IL12B	5	158756226	158756227
rs1295685	IL13	5	131996444	131996445
rs1295686	IL13	5	131995842	131995843
rs20541	IL13	5	131995963	131995964
rs2069747	IL13	5	131995605	131995606
rs848	IL13	5	131996499	131996500
rs10039453	IL17B	5	148756169	148756170
rs2227447	IL17B	5	148758026	148758027
rs2227456	IL17B	5	148756847	148756848
rs2227460	IL17B	5	148754135	148754136
rs2070874	IL4	5	132009709	132009710
rs2227282	IL4	5	132013178	132013179
rs2243251	IL4	5	132009786	132009787
rs2243266	IL4	5	132013788	132013789
rs2243268	IL4	5	132013962	132013963
rs2243270	IL4	5	132014108	132014109
rs2243279	IL4	5	132016226	132016227
rs2243290	IL4	5	132018168	132018169
rs2069823	IL5	5	131877698	131877699
rs10471960	IL6ST	5	55236373	55236374
rs10940495	IL6ST	5	55262659	55262660
rs11574780	IL6ST	5	55244037	55244038
rs11574782	IL6ST	5	55236366	55236367
rs11741953	IL6ST	5	55267813	55267814
rs3730292	IL6ST	5	55259320	55259321
rs6861772	IL6ST	5	55271620	55271621
rs6878305	IL6ST	5	55236693	55236694
rs1859430	IL9	5	135230512	135230513
rs2069885	IL9	5	135228164	135228165
rs31564	IL9	5	135230252	135230253
rs10484879	IL17A	6	52051956	52051957
rs17883570	IL17A	6	52055292	52055293
rs3748067	IL17A	6	52055338	52055339
rs3819025	IL17A	6	52051273	52051274
rs7747909	IL17A	6	52054248	52054249
rs12201582	IL17F	6	52104688	52104689
rs12203582	IL17F	6	52105556	52105557
rs2397084	IL17F	6	52101843	52101844
rs763780	IL17F	6	52101738	52101739
rs2228088	TNF	6	31543604	31543605
rs2515924	TNF	6	31543490	31543491
rs3093660	TNF	6	31543405	31543406
rs3093661	TNF	6	31543757	31543758
rs3093662	TNF	6	31544188	31544189
rs3093663	TNF	6	31544224	31544225
rs3093665	TNF	6	31545390	31545391
rs3093666	TNF	6	31545732	31545733
rs35131721	TNF	6	31544314	31544315
rs4645843	TNF	6	31544561	31544562
rs2230926	TNFAIP3	6	138196065	138196066
rs5029933	TNFAIP3	6	138192061	138192062
rs5029939	TNFAIP3	6	138195722	138195723
rs5029958	TNFAIP3	6	138204308	138204309
rs5029963	TNFAIP3	6	138194742	138194743
rs610604	TNFAIP3	6	138199416	138199417
rs643177	TNFAIP3	6	138195692	138195693
rs661561	TNFAIP3	6	138197330	138197331
rs719150	TNFAIP3	6	138192760	138192761
rs11465293	CCL24	7	75442722	75442723
rs11465307	CCL24	7	75441793	75441794
rs2302004	CCL24	7	75442854	75442855
rs2302005	CCL24	7	75442758	75442759
rs2302006	CCL24	7	75442729	75442730
rs4732416	CCL24	7	75441761	75441762
rs10275464	CCL26	7	75400672	75400673
rs2240478	CCL26	7	75401417	75401418
rs2302008	CCL26	7	75399192	75399193
rs2302009	CCL26	7	75398997	75398998
rs2868166	CCL26	7	75406912	75406913
rs7787623	CCL26	7	75404760	75404761
rs7811372	CCL26	7	75415800	75415801
rs13306435	IL6	7	22771038	22771039
rs1474347	IL6	7	22768123	22768124
rs1554606	IL6	7	22768706	22768707
rs2066992	IL6	7	22768248	22768249
rs2069832	IL6	7	22767432	22767433
rs2069835	IL6	7	22767870	22767871
rs2069837	IL6	7	22768026	22768027
rs2069849	IL6	7	22771155	22771156
rs2069857	IL6	7	22766833	22766834
rs10120977	IFNA2	9	21384362	21384363
rs10435816	IL33	9	6225534	6225535
rs1048274	IL33	9	6256291	6256292
rs10815388	IL33	9	6232241	6232242
rs10975501	IL33	9	6233220	6233221
rs10975516	IL33	9	6247692	6247693
rs10975519	IL33	9	6253570	6253571
rs11794419	IL33	9	6222109	6222110
rs12000491	IL33	9	6257366	6257367
rs12551256	IL33	9	6231238	6231239
rs1330383	IL33	9	6251506	6251507
rs1332290	IL33	9	6255880	6255881
rs16924144	IL33	9	6221245	6221246
rs16924159	IL33	9	6229416	6229417
rs16924161	IL33	9	6230911	6230912
rs16924243	IL33	9	6257053	6257054
rs1891385	IL33	9	6219844	6219845
rs2066362	IL33	9	6219175	6219176
rs2210463	IL33	9	6227751	6227752
rs4742170	IL33	9	6242949	6242950
rs7037276	IL33	9	6247429	6247430
rs996029	IL33	9	6222301	6222302
rs10795763	IL2RA	10	6096198	6096199
rs10905656	IL2RA	10	6086092	6086093
rs10905669	IL2RA	10	6092092	6092093
rs1107345	IL2RA	10	6087294	6087295
rs11256433	IL2RA	10	6077844	6077845
rs12244380	IL2RA	10	6053373	6053374
rs12719919	IL2RA	10	6054157	6054158
rs12722489	IL2RA	10	6102011	6102012
rs12722527	IL2RA	10	6077327	6077328
rs12722561	IL2RA	10	6069892	6069893
rs12722600	IL2RA	10	6054764	6054765
rs12722602	IL2RA	10	6053865	6053866
rs12722603	IL2RA	10	6053648	6053649
rs12722698	IL2RA	10	6060056	6060057
rs12722713	IL2RA	10	6054779	6054780
rs12722714	IL2RA	10	6054727	6054728
rs2025345	IL2RA	10	6067687	6067688
rs2076846	IL2RA	10	6063252	6063253
rs2104286	IL2RA	10	6099044	6099045
rs2228149	IL2RA	10	6063507	6063508
rs2256774	IL2RA	10	6097164	6097165
rs2274037	IL2RA	10	6062107	6062108
rs2386841	IL2RA	10	6057731	6057732
rs3118470	IL2RA	10	6101712	6101713
rs4749926	IL2RA	10	6085311	6085312
rs6602379	IL2RA	10	6073373	6073374
rs6602392	IL2RA	10	6078078	6078079
rs6602393	IL2RA	10	6078403	6078404
rs6602398	IL2RA	10	6082952	6082953
rs706780	IL2RA	10	6087025	6087026
rs7072398	IL2RA	10	6079845	6079846
rs7089855	IL2RA	10	6091139	6091140
rs7899538	IL2RA	10	6059897	6059898
rs7900744	IL2RA	10	6065610	6065611
rs7910961	IL2RA	10	6077795	6077796
rs791589	IL2RA	10	6089570	6089571
rs791594	IL2RA	10	6085994	6085995
rs942198	IL2RA	10	6063015	6063016
rs942200	IL2RA	10	6063673	6063674
rs9663421	IL2RA	10	6055603	6055604
rs2043055	IL18	11	112031623	112031624
rs360717	IL18	11	112034724	112034725
rs549908	IL18	11	112020915	112020916
rs5744256	IL18	11	112022847	112022848
rs5744259	IL18	11	112021602	112021603
rs5744290	IL18	11	112014327	112014328
rs11042484	TOLLIP	11	1318311	1318312
rs3168046	TOLLIP	11	1296648	1296649
rs3750920	TOLLIP	11	1309955	1309956
rs3793964	TOLLIP	11	1301981	1301982
rs3793965	TOLLIP	11	1302706	1302707
rs3829223	TOLLIP	11	1300405	1300406
rs5743867	TOLLIP	11	1328350	1328351
rs5743869	TOLLIP	11	1327751	1327752
rs5743890	TOLLIP	11	1325828	1325829
rs5743899	TOLLIP	11	1323563	1323564
rs5743942	TOLLIP	11	1314027	1314028
rs5743998	TOLLIP	11	1302276	1302277
rs5744015	TOLLIP	11	1298429	1298430
rs5744028	TOLLIP	11	1297280	1297281
rs5744029	TOLLIP	11	1297170	1297171
rs5744030	TOLLIP	11	1296750	1296751
rs5744034	TOLLIP	11	1296236	1296237
rs2046068	IL22	12	68645974	68645975
rs2227491	IL22	12	68646520	68646521
rs11171806	IL23A	12	56733530	56733531
rs11465746	IL23A	12	56733212	56733213
rs1800693	TNFRSF1A	12	6440008	6440009
rs34751757	TNFRSF1A	12	6442955	6442956
rs4149576	TNFRSF1A	12	6449114	6449115
rs4149577	TNFRSF1A	12	6447521	6447522
rs4149584	TNFRSF1A	12	6442642	6442643
rs4149639	TNFRSF1A	12	6442000	6442001
rs767455	TNFRSF1A	12	6450944	6450945
rs6783	IL17D	13	21297049	21297050
rs735539	IL17D	13	21280033	21280034
rs2200287	TNFSF11	13	43168659	43168660
rs2277439	TNFSF11	13	43155442	43155443
rs346589	TNFSF11	13	43166283	43166284
rs346592	TNFSF11	13	43167512	43167513
rs3742257	TNFSF11	13	43173197	43173198
rs588383	TNFSF11	13	43167213	43167214
rs7324282	TNFSF11	13	43137703	43137704
rs7988338	TNFSF11	13	43144841	43144842
rs7994018	TNFSF11	13	43181101	43181102
rs8002196	TNFSF11	13	43164694	43164695
rs931273	TNFSF11	13	43178582	43178583
rs9525641	TNFSF11	13	43148023	43148024
rs9533154	TNFSF11	13	43140101	43140102
rs9562414	TNFSF11	13	43176714	43176715
rs9943924	TNFSF11	13	43142683	43142684
rs11465505	IL25	14	23842587	23842588
rs11465512	IL25	14	23844022	23844023
rs3811178	IL25	14	23845243	23845244
rs7145531	IL25	14	23842016	23842017
rs7145551	IL25	14	23842039	23842040
rs8014568	IL25	14	23843362	23843363
rs223827	CCL17	16	57446006	57446007
rs223895	CCL17	16	57440895	57440896
rs223898	CCL17	16	57444562	57444563
rs4784805	CCL17	16	57441406	57441407
rs886434	CCL17	16	57444708	57444709
rs9302690	CCL17	16	57442967	57442968
rs170359	CCL22	16	57395663	57395664
rs170360	CCL22	16	57397949	57397950
rs223819	CCL22	16	57394861	57394862
rs4359426	CCL22	16	57392732	57392733
rs170361	CX3CL1	16	57414622	57414623
rs2239352	CX3CL1	16	57418187	57418188
rs4151117	CX3CL1	16	57417133	57417134
rs682082	CX3CL1	16	57407810	57407811
rs8102	CX3CL1	16	57418724	57418725
rs8323	CX3CL1	16	57418681	57418682
rs181206	IL27	16	28513402	28513403
rs181208	IL27	16	28513752	28513753
rs181209	IL27	16	28514853	28514854
rs26528	IL27	16	28517708	28517709
rs40837	IL27	16	28510844	28510845
rs1049631	IL4R	16	27375541	27375542
rs1110470	IL4R	16	27336426	27336427
rs1801275	IL4R	16	27374399	27374400
rs1805010	IL4R	16	27356202	27356203
rs1805011	IL4R	16	27373871	27373872
rs1805012	IL4R	16	27373963	27373964
rs1805013	IL4R	16	27373979	27373980
rs1805015	IL4R	16	27374179	27374180
rs1805016	IL4R	16	27374926	27374927
rs2234895	IL4R	16	27357926	27357927
rs2234897	IL4R	16	27373611	27373612
rs2234898	IL4R	16	27373914	27373915
rs2234899	IL4R	16	27373965	27373966
rs2234900	IL4R	16	27373971	27373972
rs2234924	IL4R	16	27375238	27375239
rs2239347	IL4R	16	27359020	27359021
rs2239349	IL4R	16	27358887	27358888
rs2283563	IL4R	16	27346353	27346354
rs3024530	IL4R	16	27350686	27350687
rs3024535	IL4R	16	27352120	27352121
rs3024536	IL4R	16	27352712	27352713
rs3024537	IL4R	16	27352818	27352819
rs3024544	IL4R	16	27353356	27353357
rs3024560	IL4R	16	27356666	27356667
rs3024564	IL4R	16	27356891	27356892
rs3024570	IL4R	16	27357783	27357784
rs3024584	IL4R	16	27359574	27359575
rs3024585	IL4R	16	27359843	27359844
rs3024607	IL4R	16	27363610	27363611
rs3024613	IL4R	16	27364252	27364253
rs3024614	IL4R	16	27364344	27364345
rs3024619	IL4R	16	27364805	27364806
rs3024633	IL4R	16	27366498	27366499
rs3024691	IL4R	16	27366397	27366398
rs4787423	IL4R	16	27367333	27367334
rs4787948	IL4R	16	27341058	27341059
rs6498011	IL4R	16	27331893	27331894
rs8674	IL4R	16	27375888	27375889
rs8832	IL4R	16	27375786	27375787
rs1019109	CCL11	17	32615119	32615120
rs4795898	CCL11	17	32614441	32614442
rs3136677	CCL13	17	32683557	32683558
rs11080369	CCL16	17	34305163	34305164
rs2063979	CCL16	17	34303565	34303566
rs14304	CCL18	17	34398494	34398495
rs2735835	CCL18	17	34393295	34393296
rs13900	CCL2	17	32583910	32583911
rs4586	CCL2	17	32583268	32583269
rs1065341	CCL5	17	34198592	34198593
rs16963927	CCL5	17	34204806	34204807
rs28914814	CCL5	17	34198573	34198574
rs4796120	CCL5	17	34200890	34200891
rs3091237	CCL7	17	32597802	32597803
rs3091321	CCL7	17	32597871	32597872
rs1133763	CCL8	17	32647830	32647831
rs2023906	CCR7	17	38713685	38713686
rs2229095	CCR7	17	38711221	38711222
rs2290065	CCR7	17	38716359	38716360
rs3136685	CCR7	17	38719798	38719799
rs3136687	CCR7	17	38717895	38717896
rs3136689	CCR7	17	38715101	38715102
rs1009727	IGFBP4	17	38609186	38609187
rs538399	IGFBP4	17	38610664	38610665
rs11873955	TNFRSF11A	18	60041249	60041250
rs12165104	TNFRSF11A	18	60050640	60050641
rs12455775	TNFRSF11A	18	60019849	60019850
rs12956925	TNFRSF11A	18	60013639	60013640
rs12959053	TNFRSF11A	18	60031153	60031154
rs12959396	TNFRSF11A	18	60039308	60039309
rs12969154	TNFRSF11A	18	60006142	60006143
rs12970081	TNFRSF11A	18	60028381	60028382
rs17069840	TNFRSF11A	18	60009034	60009035
rs17069876	TNFRSF11A	18	60027077	60027078
rs17069904	TNFRSF11A	18	60032948	60032949
rs17720926	TNFRSF11A	18	60014063	60014064
rs17720953	TNFRSF11A	18	60014117	60014118
rs1805034	TNFRSF11A	18	60027240	60027241
rs3826618	TNFRSF11A	18	60015541	60015542
rs3826620	TNFRSF11A	18	60021503	60021504
rs4263037	TNFRSF11A	18	60016232	60016233
rs4369774	TNFRSF11A	18	60010447	60010448
rs4426449	TNFRSF11A	18	60042816	60042817
rs4500848	TNFRSF11A	18	60014462	60014463
rs4524034	TNFRSF11A	18	60028007	60028008
rs4941129	TNFRSF11A	18	60000476	60000477
rs6567272	TNFRSF11A	18	60027170	60027171
rs6567276	TNFRSF11A	18	60044667	60044668
rs7233197	TNFRSF11A	18	59997433	59997434
rs7235803	TNFRSF11A	18	60000378	60000379
rs7237982	TNFRSF11A	18	60004252	60004253
rs8083014	TNFRSF11A	18	60030586	60030587
rs8083511	TNFRSF11A	18	60028654	60028655
rs8092336	TNFRSF11A	18	60036082	60036083
rs8094884	TNFRSF11A	18	60028127	60028128
rs9951012	TNFRSF11A	18	60023793	60023794
rs9960450	TNFRSF11A	18	60016874	60016875
rs1129763	CCL25	19	8121368	8121369
rs2287936	CCL25	19	8127330	8127331
rs2303164	CCL25	19	8122736	8122737
rs3136653	CCL25	19	8119217	8119218
rs1058867	IL10RB	21	34669380	34669381
rs2244305	IL10RB	21	34652957	34652958
rs2247526	IL10RB	21	34657686	34657687
rs2284552	IL10RB	21	34644081	34644082
rs2834167	IL10RB	21	34640787	34640788
rs2834168	IL10RB	21	34650790	34650791
rs3171425	IL10RB	21	34668746	34668747
rs735299	IL10RB	21	34664589	34664590
rs765429	IL10RB	21	34660000	34660001
rs8178556	IL10RB	21	34666554	34666555
rs8178561	IL10RB	21	34668796	34668797
rs8178562	IL10RB	21	34668975	34668976
